# Supplementary material for: Oceanographic preconditions for planning seawater heat pumps in the Baltic Sea – an example from the Tallinn Bay, Gulf of Finland
Source: Copernicus journal article supplement (doi:10.5194/sp-2023-21), 2023-08-24
Supplement: Supplementary file [file sp-2023-21-AC2-supplement.pdf]

## Author's Response

Title: Oceanographic preconditions for planning seawater heat pumps in the Baltic Sea – an example from the Tallinn Bay, Gulf of Finland

Author(s): Jüri Elken et al.

MS No.: sp-2023-21

Report: 8th edition of the Copernicus Ocean State Report (OSR8)

## Referee#2

### Comment

*The article complies with the good practice of scientific articles. However, there is little scientific innovation. Rather, we get updated and detailed information about changes in seawater temperature.*

### Response

For ourselves, a new aspect was to go beyond the traditional statistics of monthly means, variance etc., meeting the interests of end users.

### Comment

*The title of the article "Oceanographic preconditions...", just this word "preconditions" corresponds to the content of the article. A heat engineer must answer whether the heat pump is suitable to be placed in Tallinn Bay. The article provides information for this.*

### Response

We agree

### Comment

*I recommend publishing the article as presented*
